# Supplementary material
Source: publisher site journal article supplement (http://www.degruyter.com/publication/journal_key/MCMA/downloadAsset/MCMA_Instruction%20for%20Authors.pdf)
Supplement: Supplementary file 1 [file MCMA_Instruction%20for%20Authors.pdf]

# Monte Carlo Methods and Applications

## Instructions for Authors

### Submitting an article

... is done online to our ScholarOne online submission system at: <http://mc.manuscriptcentral.com/mcma>.

Contributions submitted to this journal must be written in clear and concise English. Only unpublished material can be accepted, and authors may not republish their paper in the same or similar form. The decision on the acceptance is taken after a peer-reviewing procedure. The journal makes no page charges.

The authors can provide the names and e-mail addresses of up to four potential reviewers.

### Each article

... must begin with an abstract of less than 150 words. The abstract must be followed by an appropriate classification according to MSC 2010 (Mathematics Subject Classification) and a list of 3 to 6 keywords. The short title for the running head should contain at most 80 characters, spaces inclusive.

Authors are asked to follow a few basic guidelines while formatting their paper for publication, in order for the journal to be as homogeneous in appearance as possible. Please download the LaTeX class file and the respective sample file including the instructions for formatting [here](#).

The affiliation, postal and electronic addresses of all authors should be placed at the very end of the paper.

**Figures** must be of sufficiently high resolution (minimum 600 dpi). Lettering of all figures within the article should be uniform in style (preferably a sans serif typeface like Helvetica) and of sufficient size (ca. 8 pt.). Uppercase letters A, B, C, etc. should be used to identify parts of multi-part figures. Cite all figures in the text in numerical order. Indicate the approximate placement of each figure. Do not embed figures within the text body of the manuscript; submit figures in separate files. In a TEX document EPS files may be incorporated into the TEX file by using one of the standard macro packages.

Provide a short descriptive title and a legend to make each figure self-explanatory. Explain all symbols used in the figures. Remember to use the same abbreviations as in the text body.

Authors are encouraged to submit illustrations in color if necessary for their scientific content. Publication of color figures is provided free of charge both in online and print editions.

**References** should be collected at the end of the paper, numbered with Arabic numerals in alphabetical order of the authors' names and surrounded by square brackets. Please use abbreviations for titles of journals in accordance with those listed in Mathematical Reviews.

- Articles in journals:

[1] A. Carbonaro, G. Metafuno and C. Spina, Parabolic Schrödinger operators, J. Math Anal. and Appl. 343 (2008), 965-974.

- Articles ahead of print:

[2] D. Farley and L. Sabalka, Presentations of graph braid groups, Forum Math. (2010), doi: 10.1515/FORM.2011.086.

- Books and Monographs:

[3] I. M. Isaacs, Character theory of finite groups, AMS Chelsea Publishing, 2006.

- Chapters:

[4] T. De Medts, F. Haot, R. Knop and H. Van Maldeghem, On the uniqueness of the unipotent subgroups of some Moufang sets, in: Finite Geometries, Groups, and Computation, pp. 43-66, de Gruyter, Berlin, 2006.

### **Galley proofs**

... will be sent to all authors in due time with a request to carefully check them.

### **After publication**

... each author will receive a PDF file of the final version for private use only.
